# Supplementary material for: Study of the Materials and Techniques of a Rare Papier-Mâché Mushroom Model Crafted in H. Arnoldi Factory
Source: MDPI journal article supplement (doi:10.3390/molecules28031062), 2023-01-20
Supplement: s1 [file s1]

*Supplementary Materials*

## **Study of the Materials and Techniques of a Rare Papier-mâché Mushroom Model Crafted in H. Arnoldi Factory**

Supplementary Material

**Table S1.** Identification of paper pulp type of papier-mâché and labels used in the model, by Herzberg stain test.

| Sample                                      | MO - Bright Field: Herzberg stain                                                   | Result interpretation [15,22]                                                                                                                                                   |
|---------------------------------------------|-------------------------------------------------------------------------------------|---------------------------------------------------------------------------------------------------------------------------------------------------------------------------------|
| Papier mâché paste: largest mushroom's hat  | 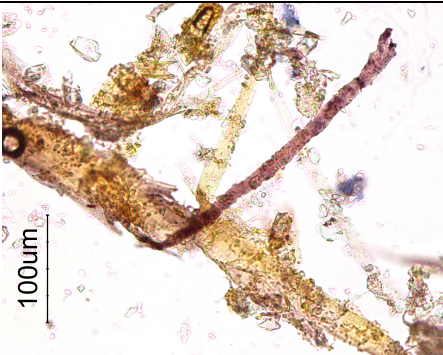   | <u>Groundwood pulp</u> (bright yellow fibres)<br><br><u>Chemical pulp</u> (purplish fibre)                                                                                      |
| Papier mâché paste: largest mushroom's stem |    | <u>Groundwood pulp</u> (bright yellow fibres)<br><br>Observation of tracheids from softwoods                                                                                    |
| Front label paper                           |   | <u>Chemical pulp</u> (purplish fibres)<br><br><u>Straw pulp</u> (bleached or unbleached): epidermal cells (blue arrows) and saclike parenchyma cells of wheat straw (red arrow) |
| Bottom label paper                          |  | <u>Chemical pulp</u> (purplish fibres)                                                                                                                                          |
